# Supplementary material for: A Combined Acceptor Photobleaching and Donor Fluorescence Lifetime Imaging Microscopy Approach to Analyze Multi-Protein Interactions in Living Cells
Source: PubMed Central journal article supplement (PMC8160235; doi:10.3389/fmolb.2021.635548), 2021-05-14

# Comparison of FRET efficiencies obtained by different methods

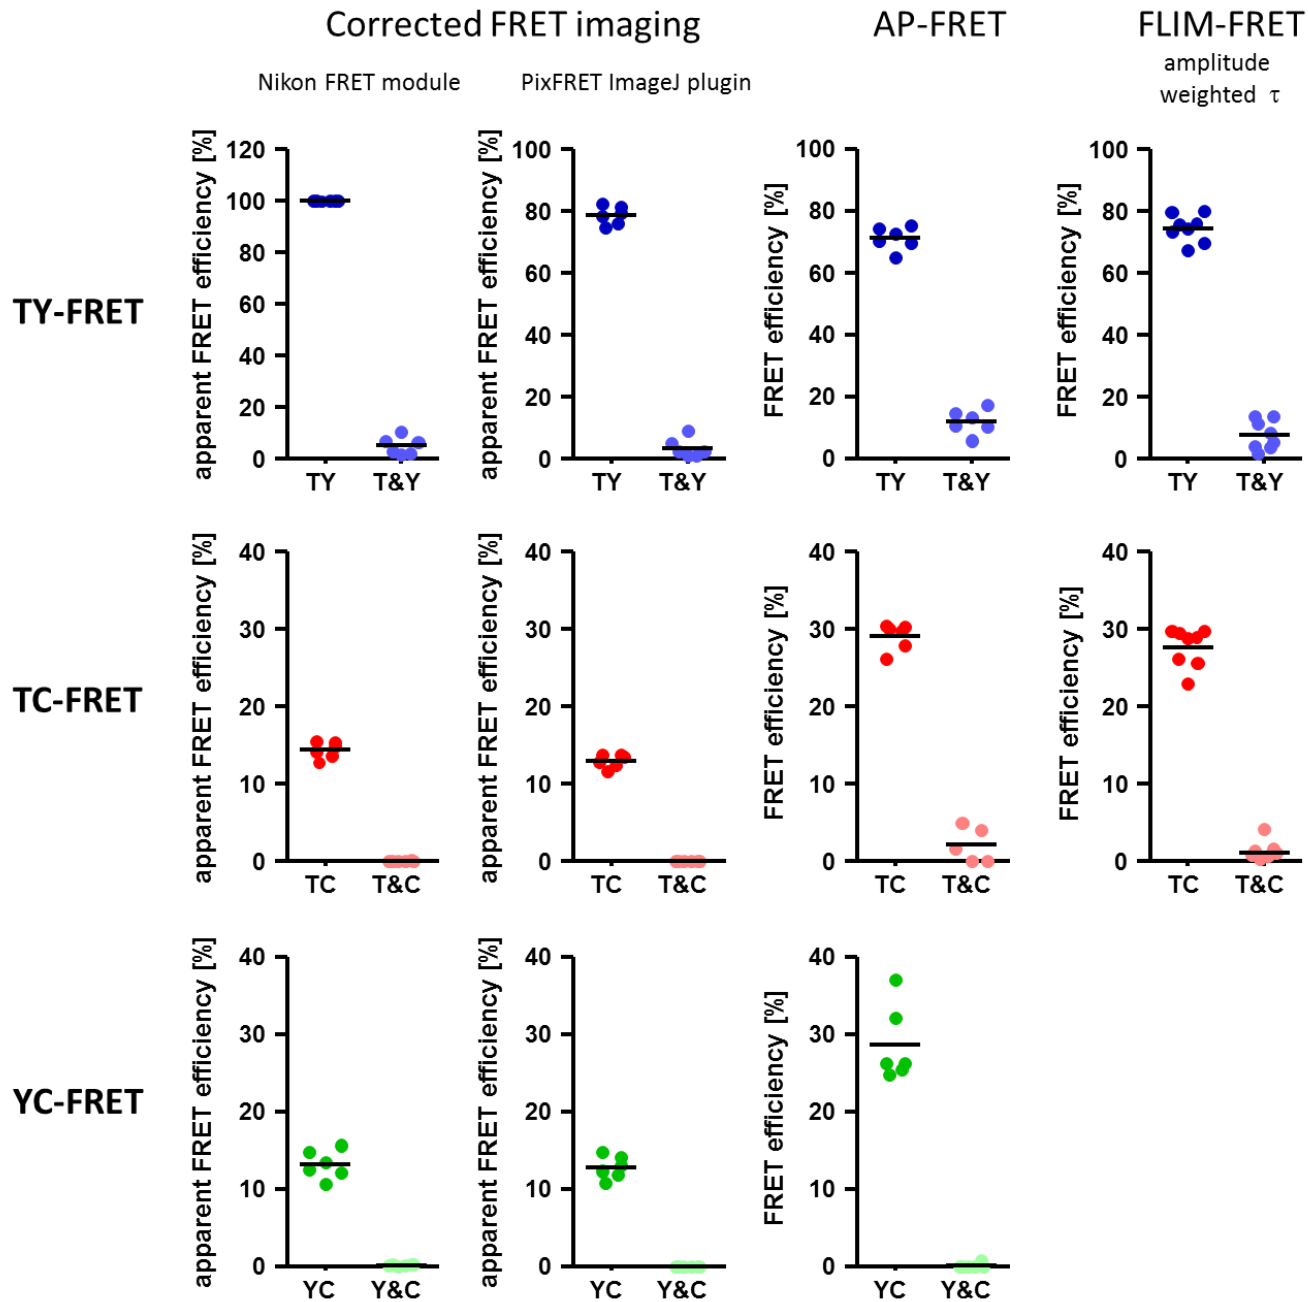

Supplement: Data_Sheet_2.pdf [file Data_Sheet_2.pdf]
