# Supplementary material for: A Combined Acceptor Photobleaching and Donor Fluorescence Lifetime Imaging Microscopy Approach to Analyze Multi-Protein Interactions in Living Cells
Source: PubMed Central journal article supplement (PMC8160235; doi:10.3389/fmolb.2021.635548), 2021-05-14

## Non-Specific FRET in the T&Y Combination

### Correlation with the donor intensity

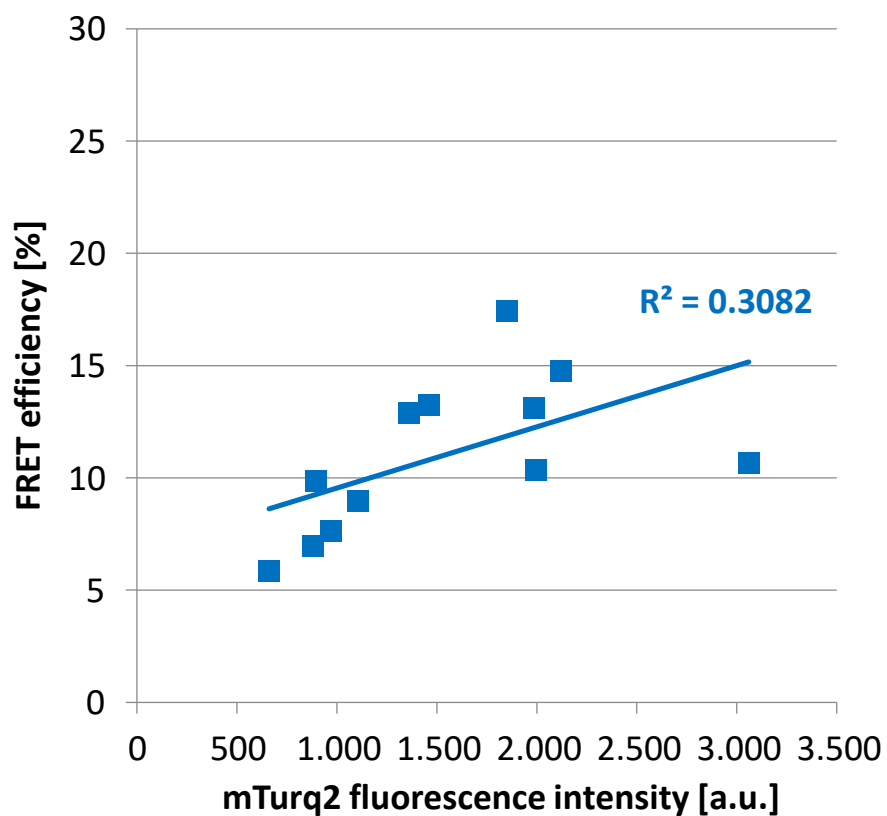

### Correlation with the acceptor intensity

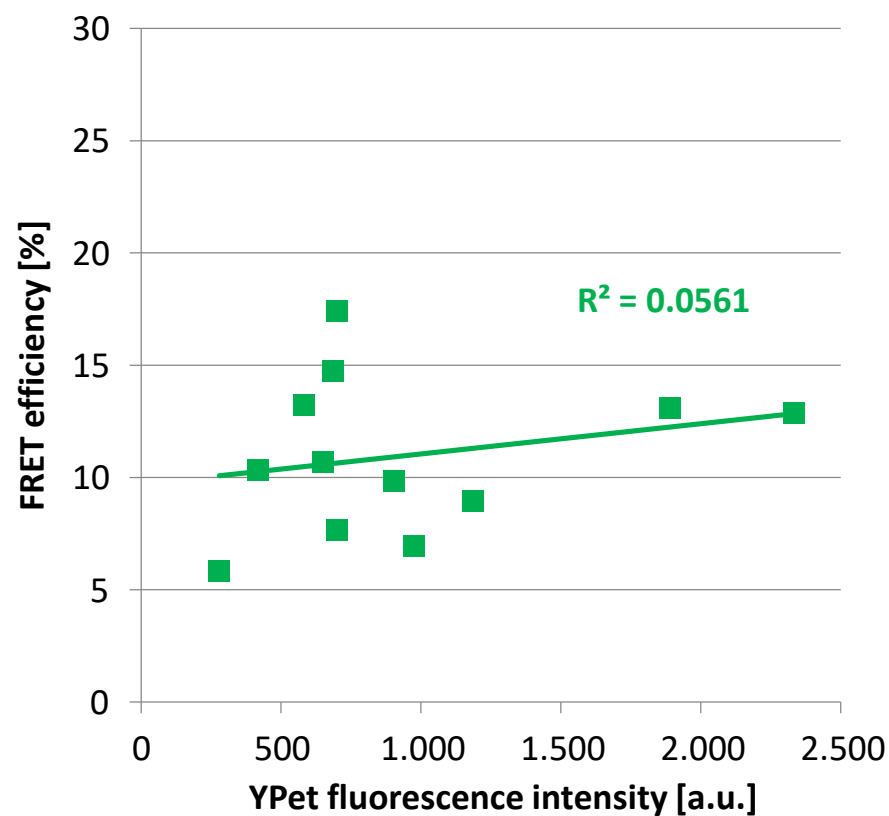

Supplement: Data_Sheet_3.pdf [file Data_Sheet_3.pdf]
